# Supplementary material
Source: Springer Nature journal article supplement (https://www.springermedizin.de/resource/supplementary/12885_2013_4661_MOESM1_ESM.pdf/9466974)

# TGF $\beta$ R1 Genotypes

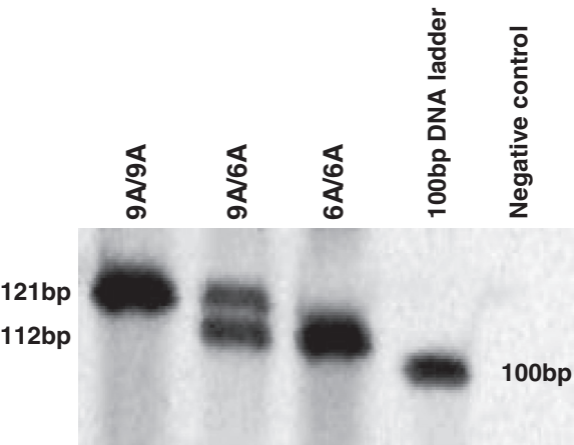

Supplement: MOESM1 [file 9466974]
